# Supplementary material for: Spatial Dissection of Invasive Front from Tumor Mass Enables Discovery of Novel microRNA Drivers of Glioblastoma Invasion
Source: PubMed Central journal article supplement (PMC8655179; doi:10.1002/advs.202101923), 2021-11-01
Supplement: ADVS-8-2101923-s002.pdf [file ADVS-8-2101923-s002.pdf]

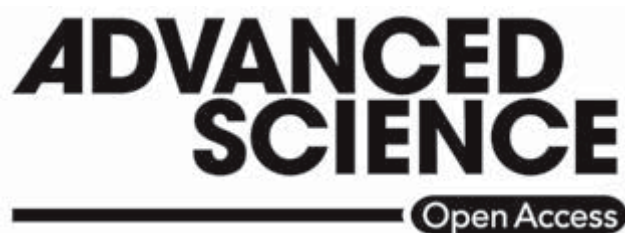

## Supporting Information

for *Adv. Sci.*, DOI: 10.1002/adv.202101923

### Spatial Dissection of Invasive Front from Tumor Mass Enables Discovery of Novel microRNA Drivers of Glioblastoma Invasion

*Yulun Huang*<sup>1,2‡</sup>, *Lin Qi*<sup>2,3‡</sup>, *Mari Kogiso*<sup>2</sup>, *Yuchen Du*<sup>2,3</sup>, *Frank K. Braun*<sup>2</sup>, *Huiyuan Zhang*<sup>2</sup>, *Lei F. Huang*<sup>4</sup>, *Sophie Xiao*<sup>3</sup>, *Wan-Yee Teo*<sup>5</sup>, *Holly Lindsay*<sup>2</sup>, *Sibo Zhao*<sup>2</sup>, *Patricia Baxter*<sup>2</sup>, *Jack MF Su*<sup>2</sup>, *Adekunle Adesina*<sup>6</sup>, *Jianhua Yang*<sup>2</sup>, *Sebastian Brabetz*<sup>7,8</sup>, *Marcel Kool*<sup>7,8</sup>, *Stefan M. Pfister*<sup>7,8,9</sup>, *Murali Chintagumpala*<sup>2</sup>, *Laszlo Perlaky*<sup>2</sup>, *Zhong Wang*<sup>1</sup>, *Youxin Zhou*<sup>1</sup>, *Tsz-Kwong Man*<sup>2</sup>, *Xiao-Nan Li*<sup>2,3\*</sup>

**Supplemental Figures**

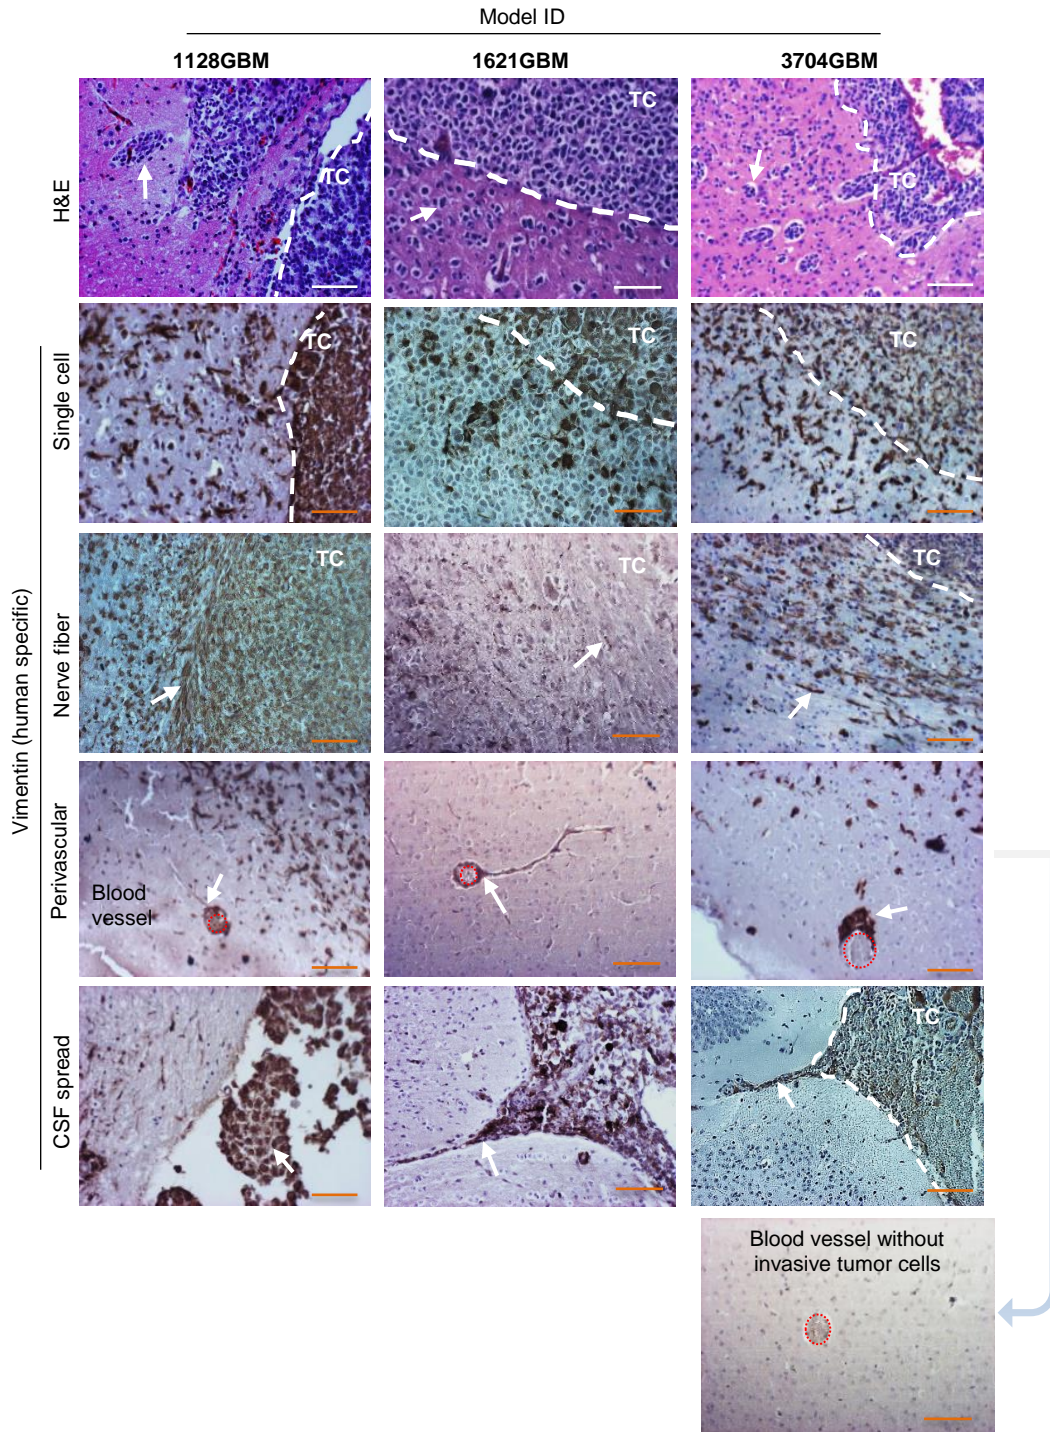

**Suppl. Figure 1. Replication of diffuse invasion of pGBMs in PDOX models.** H&E and Immunohistochemical staining vimentin showing different pattern and route of invasive growth of the remaining three pGBM PDOX models, IC-1128GBM, IC-1621GBM and IC-3704GBM.

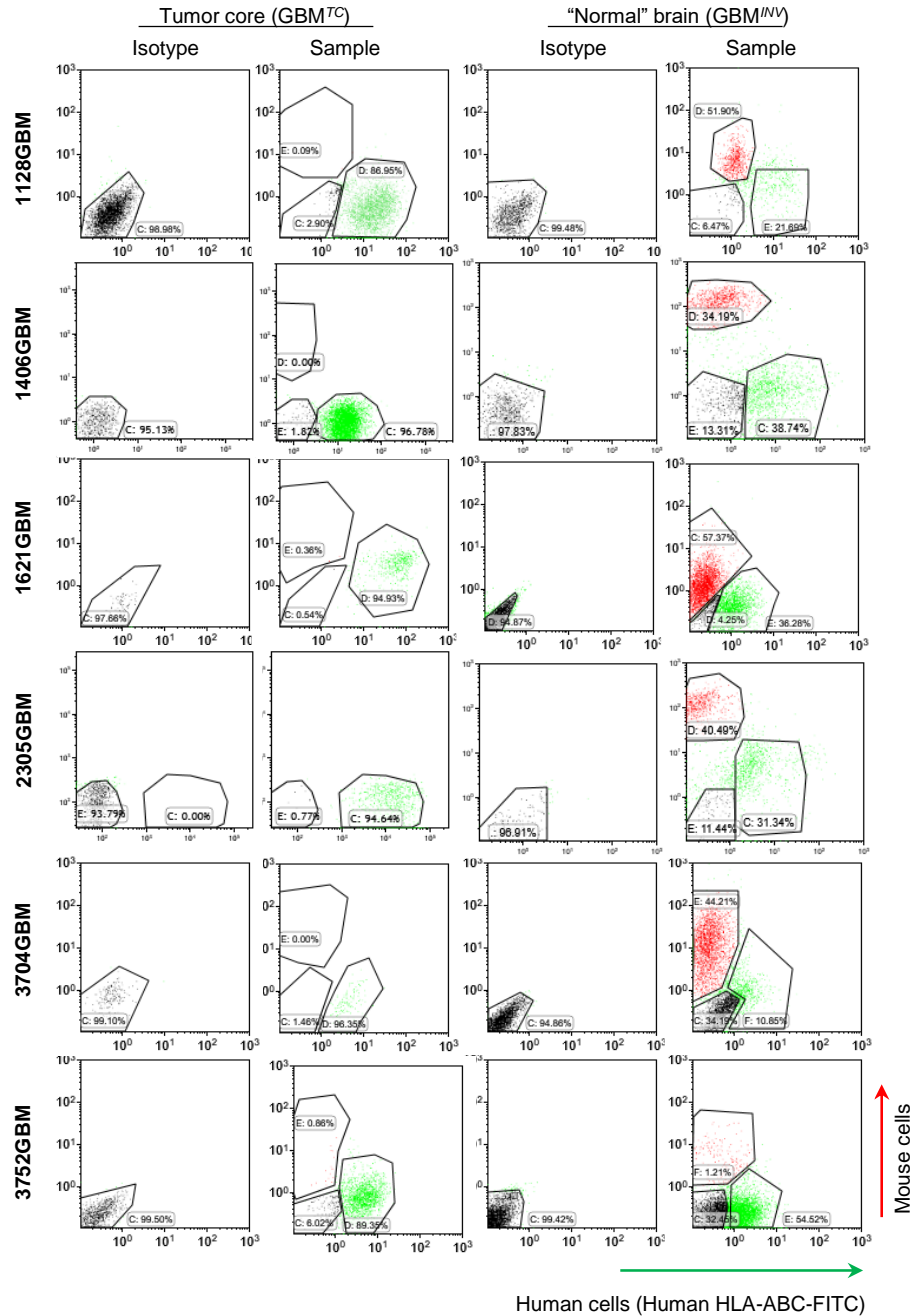

**Suppl. Figure 2. FACS purification of GBM<sup>TC</sup> cells from tumor core and GBM<sup>INV</sup> cells from the matching “normal” mouse brains.** Tumor core and “normal” mouse brains were dissociated into single cell suspensions using Gentle Dissociator (Miltenyi) and incubated with FITC-conjugated monoclonal antibodies against human HLA-ABC, -DR and APC-conjugated monoclonal antibodies against mouse major histocompatibility antigen. The mouse cells (APC-positive and FITC-negative) were gated out together with the dead cells (propidium iodine high).

**a** Down-regulating miRNA<sup>INV</sup> in GBM<sup>INV</sup> cells leads to decreased invasion *in vitro* without affecting proliferation

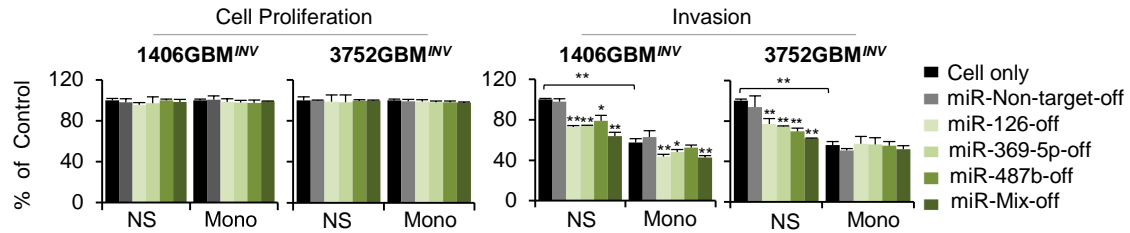

|                    | 1406GBM <sup>INV</sup> NS |                    |             |                |              |             |         | 1406GBM <sup>INV</sup> Mono |                    |             |                |              |             |
|--------------------|---------------------------|--------------------|-------------|----------------|--------------|-------------|---------|-----------------------------|--------------------|-------------|----------------|--------------|-------------|
|                    | Cell only                 | miR-Non-target-off | miR-126-off | miR-369-5p-off | miR-487b-off | miR-Mix-off | p value | Cell only                   | miR-Non-target-off | miR-126-off | miR-369-5p-off | miR-487b-off | miR-Mix-off |
| miR-Non-target-off | 0.738                     |                    | <0.001      | <0.001         | <0.001       | <0.001      |         | 0.367                       |                    | <0.001      | <0.001         | 0.017        | <0.001      |
| miR-126-off        | <0.001                    | <0.001             |             | 0.691          | 0.184        | 0.036       |         | 0.001                       | <0.001             |             | 0.279          | 0.048        | 0.757       |
| miR-369-5p-off     | <0.001                    | <0.001             | 0.691       |                | 0.407        | 0.033       |         | 0.035                       | <0.001             | 0.279       |                | 0.387        | 0.359       |
| miR-487b-off       | <0.001                    | <0.001             | <0.001      | 0.407          |              | <0.001      |         | 0.362                       | 0.017              | 0.048       | 0.387          |              | 0.03        |
| miR-Mix-off        | <0.001                    | <0.001             | <0.001      | 0.033          | <0.001       |             |         | <0.001                      | <0.001             | 0.757       | 0.359          | 0.03         |             |

  

|                    | 3752GBM <sup>INV</sup> NS |                    |             |                |              |             |         | 3752GBM <sup>INV</sup> Mono |                    |             |                |              |             |
|--------------------|---------------------------|--------------------|-------------|----------------|--------------|-------------|---------|-----------------------------|--------------------|-------------|----------------|--------------|-------------|
|                    | Cell only                 | miR-Non-target-off | miR-126-off | miR-369-5p-off | miR-487b-off | miR-Mix-off | p value | Cell only                   | miR-Non-target-off | miR-126-off | miR-369-5p-off | miR-487b-off | miR-Mix-off |
| miR-Non-target-off | 0.203                     |                    | <0.001      | <0.001         | <0.001       | <0.001      |         | 0.795                       |                    | 0.605       | 0.67           | 0.843        | 0.999       |
| miR-126-off        | <0.001                    | <0.001             |             | 0.522          | 0.17         | 0.002       |         | 0.995                       | 0.605              |             | 0.905          | 0.999        | 0.828       |
| miR-369-5p-off     | <0.001                    | <0.001             | 0.522       |                | 0.245        | 0.009       |         | 0.995                       | 0.67               | 0.905       |                | 0.998        | 0.842       |
| miR-487b-off       | <0.001                    | <0.001             | 0.17        | 0.245          |              | 0.201       |         | 0.982                       | 0.843              | 0.999       | 0.998          |              | 0.949       |
| miR-Mix-off        | <0.001                    | <0.001             | 0.002       | 0.009          | 0.201        |             |         | 0.916                       | 0.999              | 0.828       | 0.842          | 0.949        |             |

**b** Up-regulating miRNA<sup>INV</sup> in GBM<sup>TC</sup> cells leads to increased invasion *in vitro* without affecting proliferation

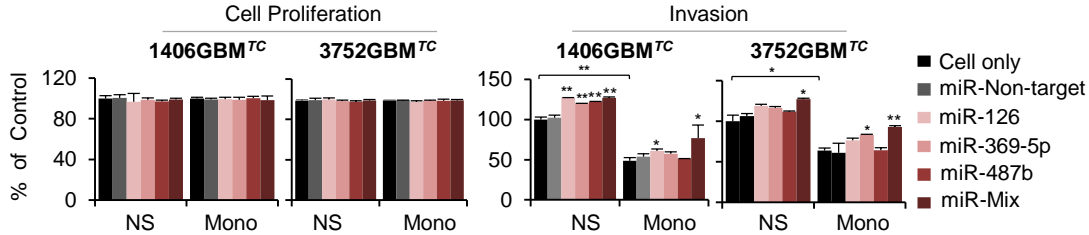

|                | 1406GBM <sup>TC</sup> NS |                |         |            |          |         |         | 1406GBM <sup>TC</sup> Mono |                |         |            |          |         |
|----------------|--------------------------|----------------|---------|------------|----------|---------|---------|----------------------------|----------------|---------|------------|----------|---------|
|                | Cell only                | miR-Non-target | miR-126 | miR-369-5p | miR-487b | miR-Mix | p value | Cell only                  | miR-Non-target | miR-126 | miR-369-5p | miR-487b | miR-Mix |
| miR-Non-target | 0.879                    |                | <0.001  | <0.001     | <0.001   | <0.001  |         | 0.614                      |                | 0.323   | 0.74       | 0.723    | <0.001  |
| miR-126        | <0.001                   | <0.001         |         | 0.323      | 0.614    | 1       |         | 0.022                      | 0.323          |         | 0.736      | 0.096    | 0.005   |
| miR-369-5p     | <0.001                   | <0.001         | 0.323   |            | 0.787    | 0.284   |         | 0.15                       | 0.74           | 0.736   |            | 0.4      | <0.001  |
| miR-487b       | <0.001                   | <0.001         | 0.614   | 0.787      |          | 0.533   |         | 0.506                      | 0.723          | 0.096   | 0.4        |          | <0.001  |
| miR-Mix        | <0.001                   | <0.001         | 1       | 0.284      | 0.533    |         |         | <0.001                     | <0.001         | 0.005   | <0.001     | <0.001   |         |

  

|                | 3752GBM <sup>TC</sup> NS |                |         |            |          |         |         | 3752GBM <sup>TC</sup> Mono |                |         |            |          |         |
|----------------|--------------------------|----------------|---------|------------|----------|---------|---------|----------------------------|----------------|---------|------------|----------|---------|
|                | Cell only                | miR-Non-target | miR-126 | miR-369-5p | miR-487b | miR-Mix | p value | Cell only                  | miR-Non-target | miR-126 | miR-369-5p | miR-487b | miR-Mix |
| miR-Non-target | 0.281                    |                | 0.009   | 0.033      | 0.287    | <0.001  |         | 0.686                      |                | 0.003   | <0.001     | 0.805    | <0.001  |
| miR-126        | <0.001                   | 0.009          |         | 0.489      | 0.195    | 0.124   |         | 0.007                      | 0.003          |         | 0.246      | 0.007    | <0.001  |
| miR-369-5p     | <0.001                   | 0.033          | 0.489   |            | 0.297    | 0.034   |         | <0.001                     | <0.001         | 0.246   |            | <0.001   | 0.037   |
| miR-487b       | 0.017                    | 0.287          | 0.195   | 0.297      |          | 0.001   |         | 0.969                      | 0.805          | 0.007   | <0.001     |          | <0.001  |
| miR-Mix        | <0.001                   | <0.001         | 0.124   | 0.034      | 0.001    |         |         | <0.001                     | <0.001         | <0.001  | 0.037      | <0.001   |         |

**Suppl. Figure 3. *In vitro* functional analysis of miRNA<sup>INV</sup> on cell proliferation and invasion in GBM<sup>TC</sup> and GBM<sup>INV</sup> cells.** (a) Loss-of-function of miRNA<sup>INV</sup> in the invasive GBM (GBM<sup>INV</sup>) cells from two models IC-1406GBM (**1406GBM<sup>INV</sup>**) and IC-3752GBM (**3752GBM<sup>INV</sup>**). Cell proliferation and invasive capacity after silencing miR-126, -369-5p, and -487b with Lentivirus-miRNA-off. (b) Gain-of-function of miRNA<sup>INV</sup> in the tumor core (GBM<sup>TC</sup>) cells from two models (1406GBM<sup>TC</sup>) and 3752GBM<sup>TC</sup>). Cells were maintained both as neurosphere (*NS*) and monolayer (*Mono*), and all the data were normalized to the NS cell only group. In addition to the graphs (that were presented in Figure 4A), *P* values of pair-wise comparisons of tumor cell invasion were listed. (\*\**P* < 0.01, \**P* < 0.05 compared to the control group by two-way ANOVA, n = 3. Data are shown as mean ± SD).

**a** Down-regulation of miRNA<sup>TC</sup> in GBM<sup>TC</sup> cells leads to increased invasion *in vitro* without affecting proliferation

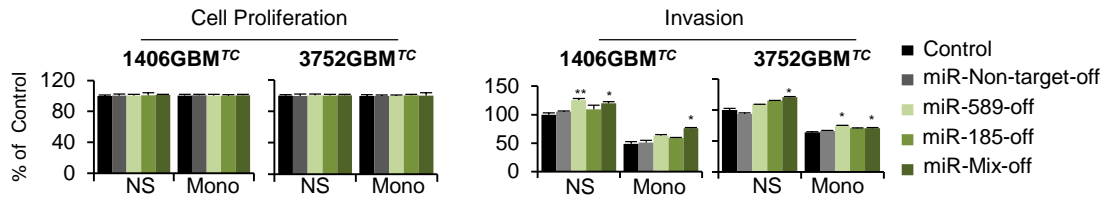

| 1406GBM <sup>TC</sup><br>miRNA <sup>TC</sup> | NS ( <i>P</i> value) |                    |             |             |             | Mono ( <i>P</i> value) |                    |             |             |             |
|----------------------------------------------|----------------------|--------------------|-------------|-------------|-------------|------------------------|--------------------|-------------|-------------|-------------|
|                                              | Cell only            | miR-Non-target-off | miR-589-off | miR-185-off | miR-Mix-off | Cell only              | miR-Non-target-off | miR-589-off | miR-185-off | miR-Mix-off |
| miR-Non-target-off                           | 0.67                 | 0.007              | 0.007       | 0.684       | 0.019       | 0.67                   | 0.113              | 0.113       | 0.339       | <0.001      |
| miR-589-off                                  | <0.001               | 0.007              |             | 0.031       | 0.62        | 0.063                  | 0.113              |             | 0.638       | 0.125       |
| miR-185-off                                  | 0.288                | 0.684              | 0.031       |             | 0.078       | 0.211                  | 0.339              | 0.638       |             | 0.025       |
| miR-Mix-off                                  | 0.002                | 0.019              | 0.62        | 0.078       |             | <0.001                 | <0.001             | 0.125       | 0.025       |             |

| 3752GBM <sup>TC</sup><br>miRNA <sup>TC</sup> | NS ( <i>P</i> value) |                    |             |             |             | Mono ( <i>P</i> value) |                    |             |             |             |
|----------------------------------------------|----------------------|--------------------|-------------|-------------|-------------|------------------------|--------------------|-------------|-------------|-------------|
|                                              | Cell only            | miR-Non-target-off | miR-589-off | miR-185-off | miR-Mix-off | Cell only              | miR-Non-target-off | miR-589-off | miR-185-off | miR-Mix-off |
| miR-Non-target-off                           | 0.305                |                    | 0.004       | <0.001      | <0.001      | 0.604                  |                    | 0.15        | 0.548       | 0.005       |
| miR-589-off                                  | 0.089                | 0.004              |             | 0.155       | 0.036       | 0.066                  | 0.15               |             | 0.452       | 0.364       |
| miR-185-off                                  | 0.005                | <0.001             | 0.155       |             | 0.271       | 0.39                   | 0.548              | 0.452       |             | 0.068       |
| miR-Mix-off                                  | <0.001               | <0.001             | 0.036       | 0.271       |             | 0.002                  | 0.005              | 0.364       | 0.068       |             |

**b** Up-regulation of miRNA<sup>TC</sup> in GBM<sup>INV</sup> cells leads to decreased invasion *in vitro* without affecting proliferation

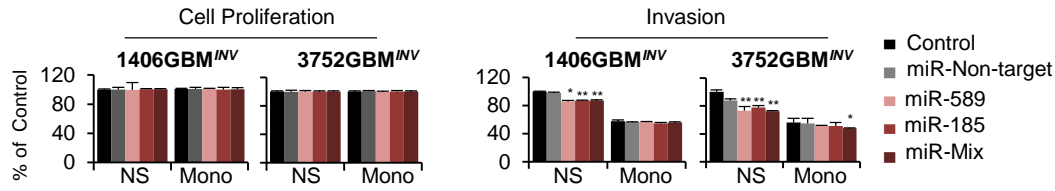

| 1406GBM <sup>INV</sup><br>miRNA <sup>TC</sup> | NS ( <i>P</i> value) |                |         |         |         | Mono ( <i>P</i> value) |                |         |         |         |
|-----------------------------------------------|----------------------|----------------|---------|---------|---------|------------------------|----------------|---------|---------|---------|
|                                               | Cell only            | miR-Non-target | miR-589 | miR-185 | miR-Mix | Cell only              | miR-Non-target | miR-589 | miR-185 | miR-Mix |
| miR-Non-target                                | 0.746                |                | <0.001  | <0.001  | <0.001  | 0.766                  |                | 0.76    | 0.696   | 0.057   |
| miR-589                                       | <0.001               | <0.001         |         | 0.598   | 0.803   | 0.439                  | 0.76           |         | 0.822   | 0.391   |
| miR-185                                       | <0.001               | <0.001         | 0.598   |         | 0.948   | 0.765                  | 0.696          | 0.822   |         | 0.119   |
| miR-Mix                                       | <0.001               | <0.001         | 0.803   | 0.948   |         | 0.014                  | 0.057          | 0.391   | 0.119   |         |

| 3752GBM <sup>INV</sup><br>miRNA <sup>TC</sup> | NS        |                |         |         |         | Mono      |                |         |         |         |
|-----------------------------------------------|-----------|----------------|---------|---------|---------|-----------|----------------|---------|---------|---------|
|                                               | Cell only | miR-Non-target | miR-589 | miR-185 | miR-Mix | Cell only | miR-Non-target | miR-589 | miR-185 | miR-Mix |
| miR-Non-target                                | <0.001    |                | <0.001  | <0.001  | <0.001  | 0.65      |                | 0.264   | 0.168   | 0.005   |
| miR-589                                       | <0.001    | <0.001         |         | 0.018   | 0.558   | 0.087     | 0.264          |         | 0.66    | 0.172   |
| miR-185                                       | <0.001    | <0.001         | 0.018   |         | 0.007   | 0.037     | 0.168          | 0.66    |         | 0.244   |
| miR-Mix                                       | <0.001    | <0.001         | 0.558   | 0.007   |         | <0.001    | 0.005          | 0.172   | 0.244   |         |

**Suppl. Figure 4. *In vitro* functional analysis of miRNAs that were over-expressed in the tumor core cells (miRNA<sup>TC</sup>) on cell proliferation and invasion in GBM<sup>TC</sup> and GBM<sup>INV</sup> cells. (a) Loss-of-function of miRNA<sup>TC</sup>, miR-589 and miR-185, in tumor core GBM (GBM<sup>TC</sup>) cells from two models IC-1406GBM**

(**1406GBM<sup>TC</sup>**) and IC-3752GBM (**3752GBM<sup>TC</sup>**). Cell proliferation and invasive capacity after silencing miR-589, and -185 alone and in combination with Lentivirus-miRNA-off. (b) Gain-of-function of miRNA<sup>TC</sup> in the invasive (GBM<sup>INV</sup>) cells from two models (**1406GBM<sup>INV</sup>** and **3752GBM<sup>INV</sup>**) cells. Cells were maintained both as neurosphere (*NS*) and monolayer (*Mono*), and all the data were normalized to the NS cell only group. Both the graphs and *P* values of pair-wise comparisons of tumor cell invasion were listed. (\*\**P* < 0.01, \**P* < 0.05 compared to the control group by two-way ANOVA, n = 3. Data are shown as mean ± SD).

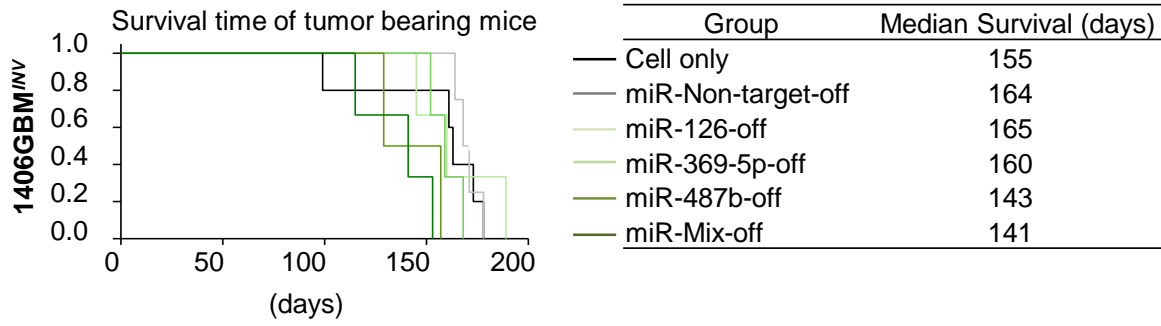

**Suppl. Figure 5. Log-rank analysis of survival time in tumor bearing mice.** 1406GBM<sup>INV</sup> cells were transduced with Lentivirus-miRNA-off to silence the miRNA<sup>INV</sup>, followed by implantation into the brains of NOD/SCID mice (1x10<sup>5</sup> cells/mouse brain). Survival times of mice bearing confirmed intra-cerebral xenograft tumors were compared ( $P>0.05$ ).



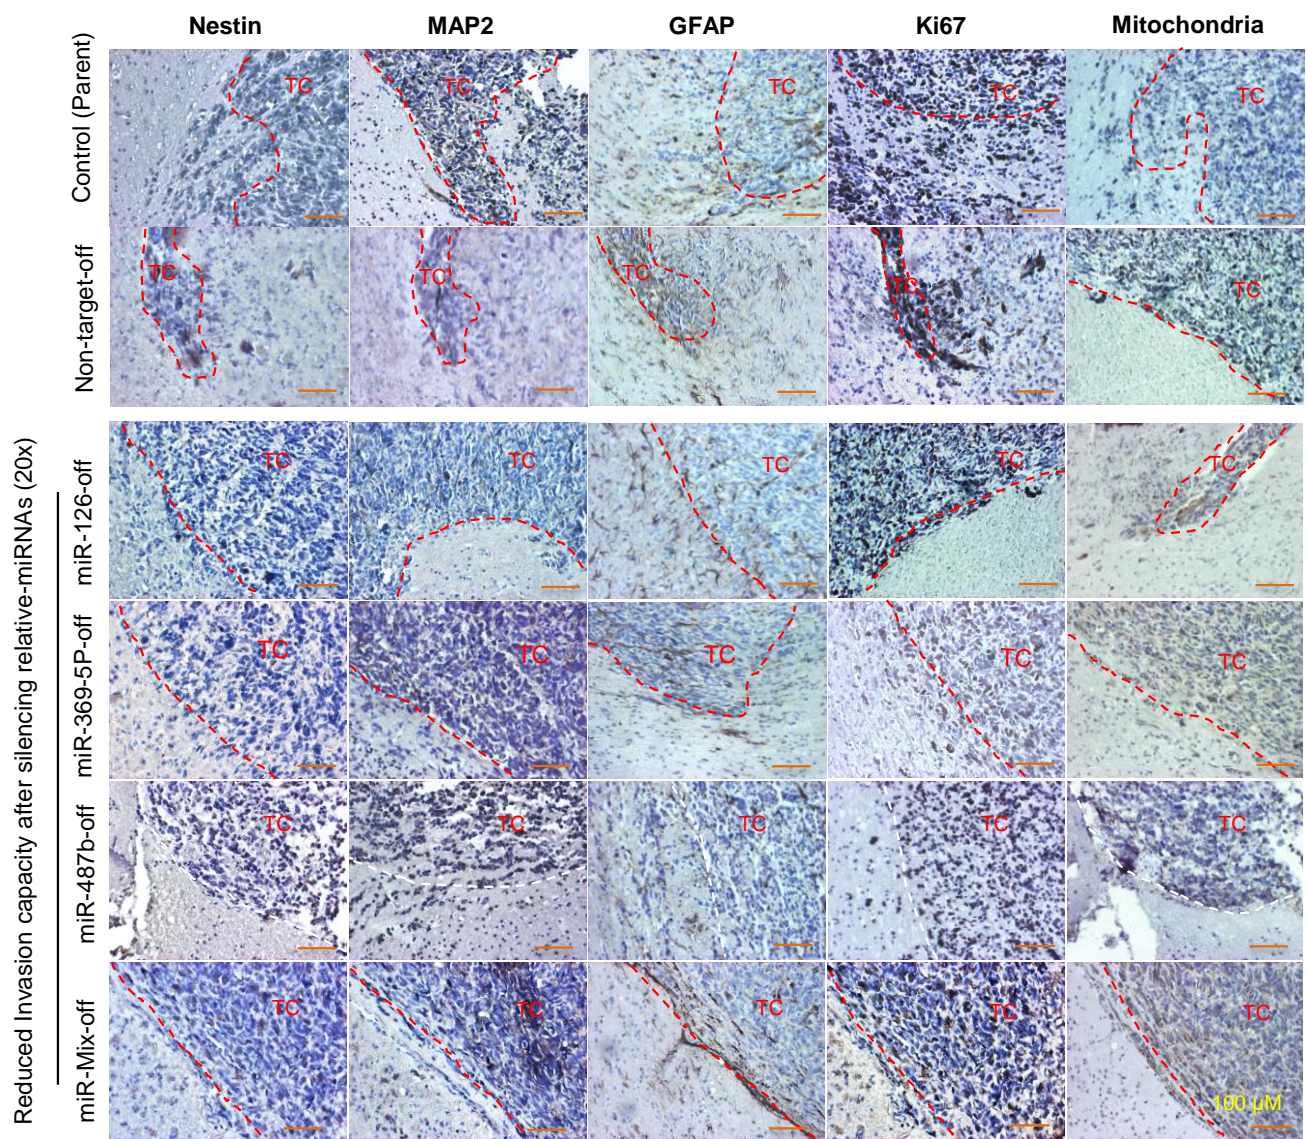

Summary of immunohistochemical staining after silencing miRNA<sup>INV</sup> in IC-1406GBM

| 1406GBM <sup>INV</sup> -Lenti- | Nestin | MAP2 | GFAP | Ki67 | Mitochondria |
|--------------------------------|--------|------|------|------|--------------|
| Control                        | ++3*   | +++2 | +++2 | +++4 | +1           |
| miR-Non-target-off             | +2     | ++1  | +++2 | +++3 | +++2         |
| miR-126-off                    | -1     | -1   | +++1 | +++3 | +1           |
| miR-369-5p-off                 | -1     | +1   | +++1 | ++3  | +1           |
| miR-487b-off                   | +2     | +++3 | +++1 | +++4 | +/-1         |
| miR-Mix-off                    | -1     | +2   | +++1 | +++3 | +1           |

\*Intensity of staining: weak(+); moderate(++); strong(+++). Percentage: 1=<25%, 2=25-50%, 3=50-75%, 4=>75%

**Suppl. Figure 6. Changes of differentiation and proliferation markers in xenograft tumors derived from GBM<sup>INV</sup> cells of IC-1406GBM following the silencing of miRNA<sup>INV</sup>.** Whole mouse brains were paraffin embedded and serially sectioned. Protein expression of stem cell marker (*Nestin*), neural

differentiation (*MAP2*), glial marker (*GFAP*), cell proliferation (*Ki67*) and mitochondria were examined through IHC (*top panel*). Borderlines of tumor core (*TC*) were highlighted (*dotted red lines*). Note the significantly reduced invasion in tumors of which miRNA<sup>INV</sup> (*miR-126-off*, *miR-369-5p-off*, *miR-487b-off*, and *the miR-mix-off*) were silenced. The intensity and relative abundance of positive IHC staining were summarized (*lower panel*). Scale bars represent 100  $\mu$ M. Data are shown as mean  $\pm$  SD.

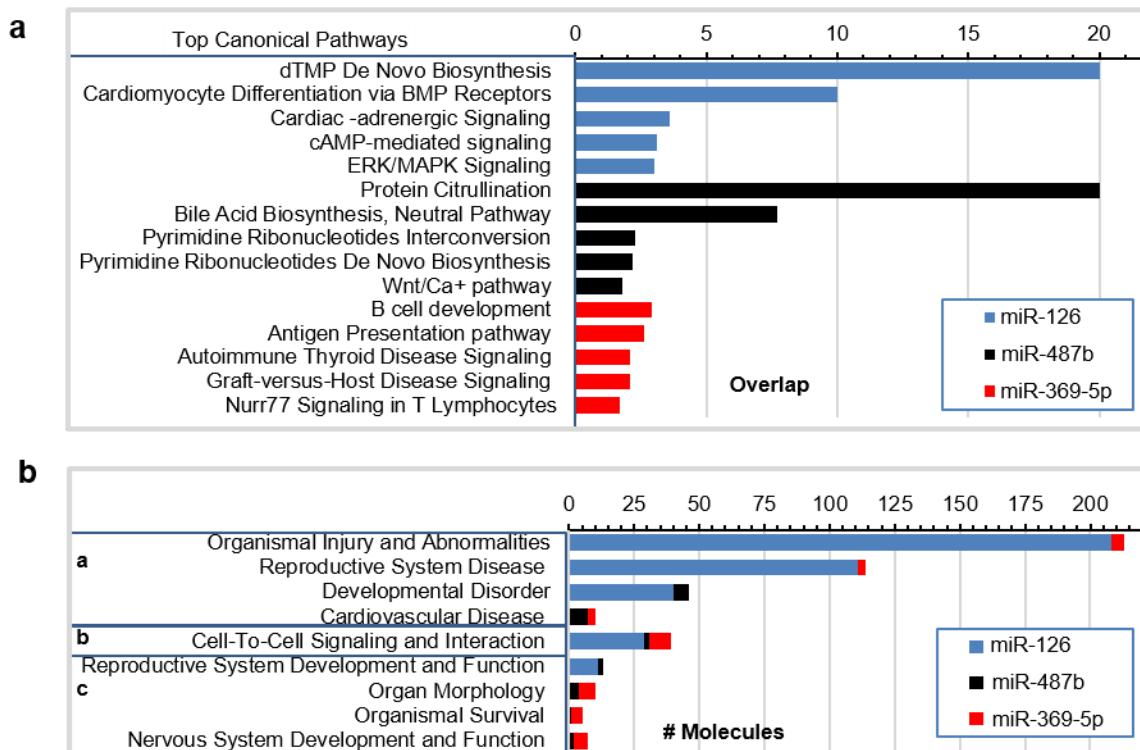

**Suppl. Figure 7.** The miRNA<sup>INV</sup> targeted a set of shared and private signaling pathways. **a** and **b** Pathway enrichment analysis and associated diseases of the differentially expressed target genes of was performed through Ingenuity with Fisher's exact test.

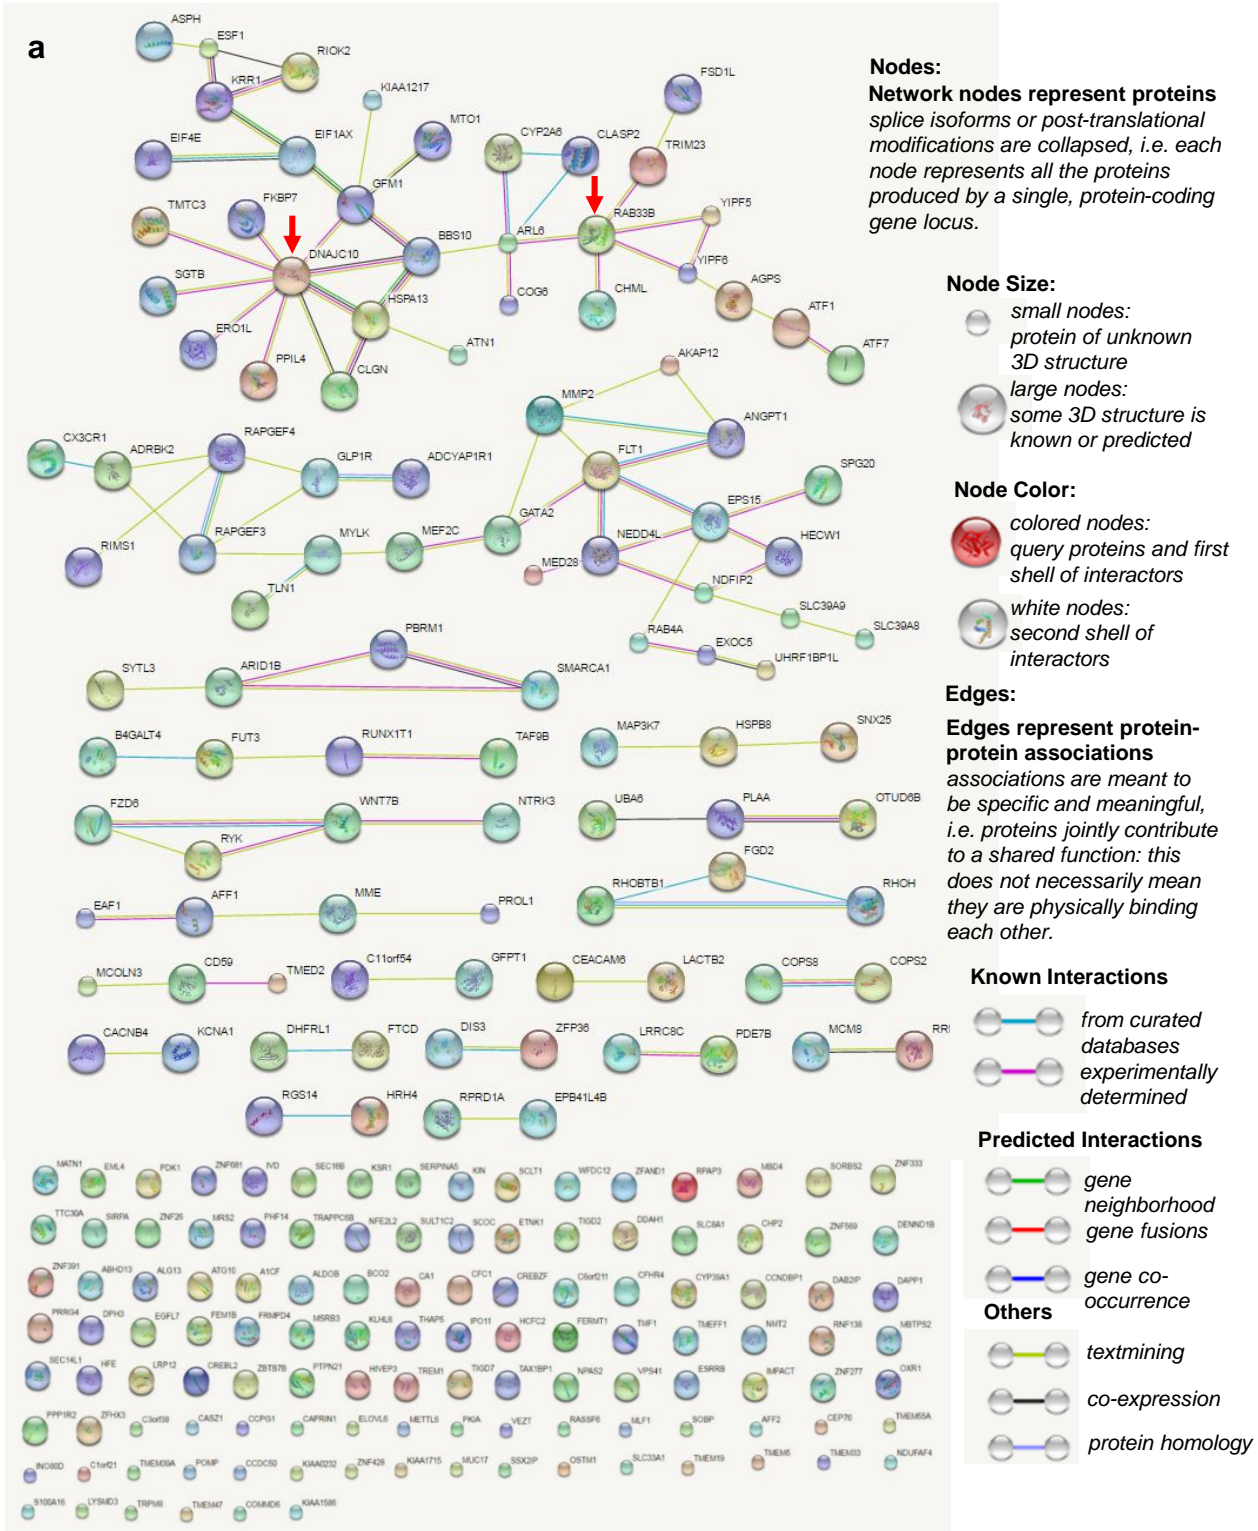

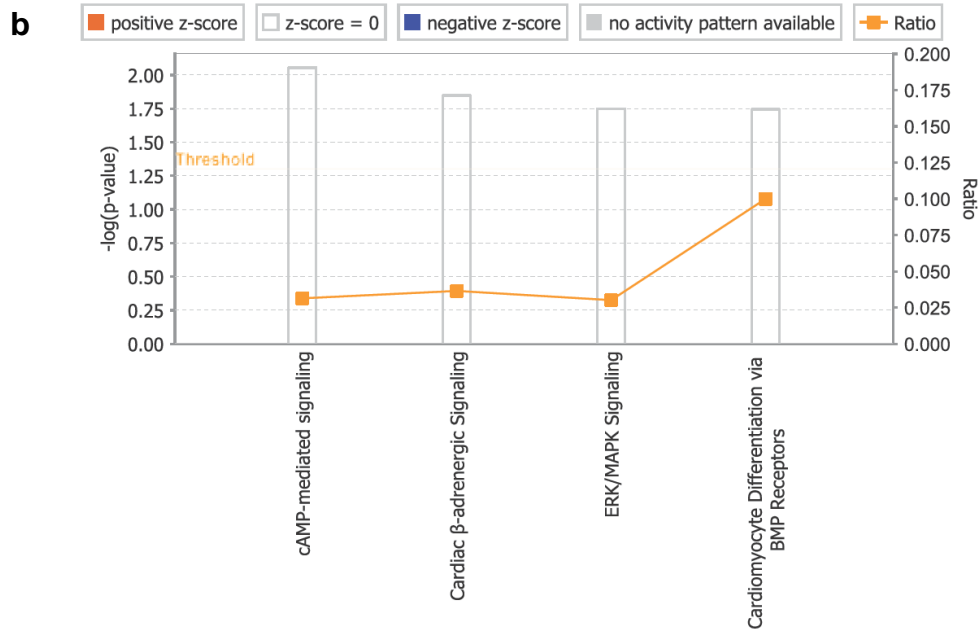

**Suppl. Figure 8. Protein-protein interaction network and pathways targeted by miR-126 in GBM<sup>INV</sup> cells.** (a) The target genes of miR-126 were identified through reverse reverse search of TargetScan and their expression levels extracted from mRNA profiling of the same sets of GBM<sup>INV</sup> and GBM<sup>TC</sup> cells. The target genes of micro-RNA were inputted into STRING (<http://www.string-db.org>) and 20 necessary proteins were added into the network except for the target genes. The output network is the protein-protein interactions between the targeted genes and those necessary added proteins. Red arrow indicated the node of genes. (b) Pathway enrichment analysis and associated diseases using genes from miR-126 targeted gene network. Fisher's exact test was employed. Significant enriched pathways with  $p < 0.05$  (equal to  $-\log(p\text{-value})$  larger than 1.301) were listed out. Ratio indicates the overlap rate of genes between the network genes and the pathway in Ingenuity database.

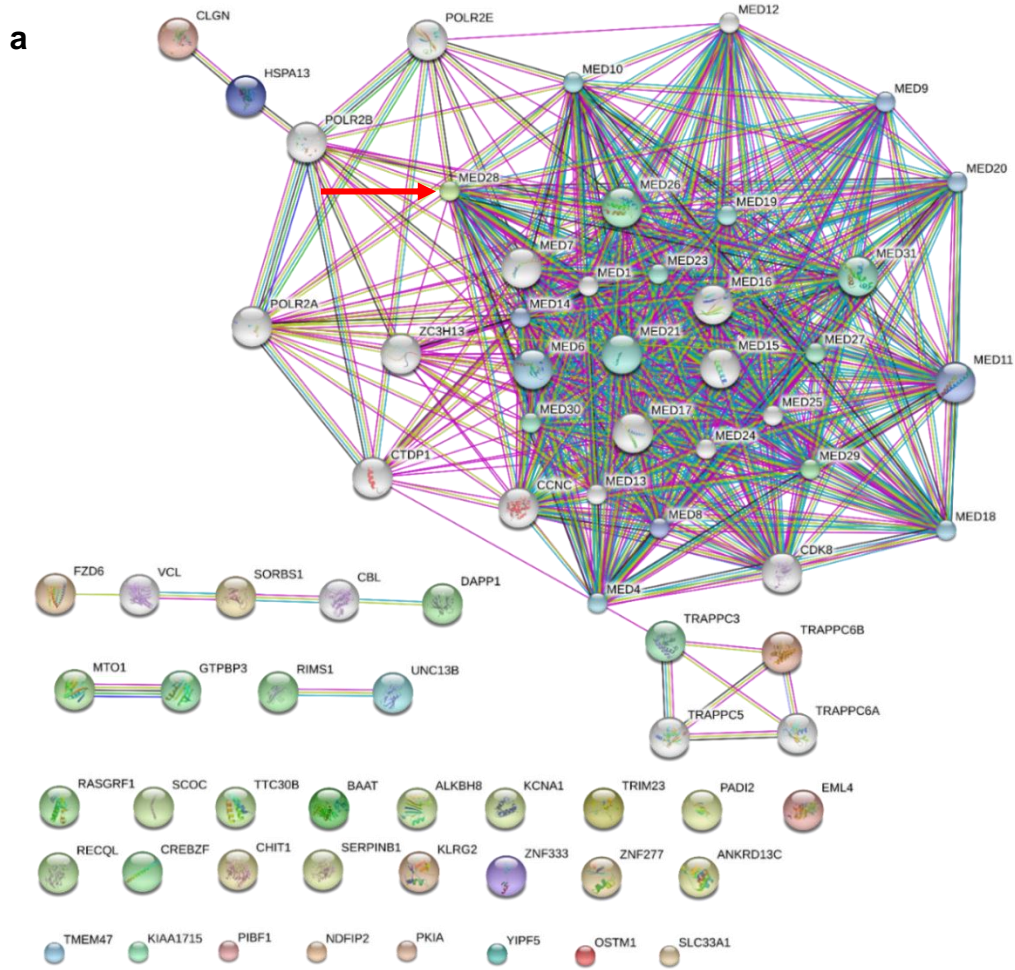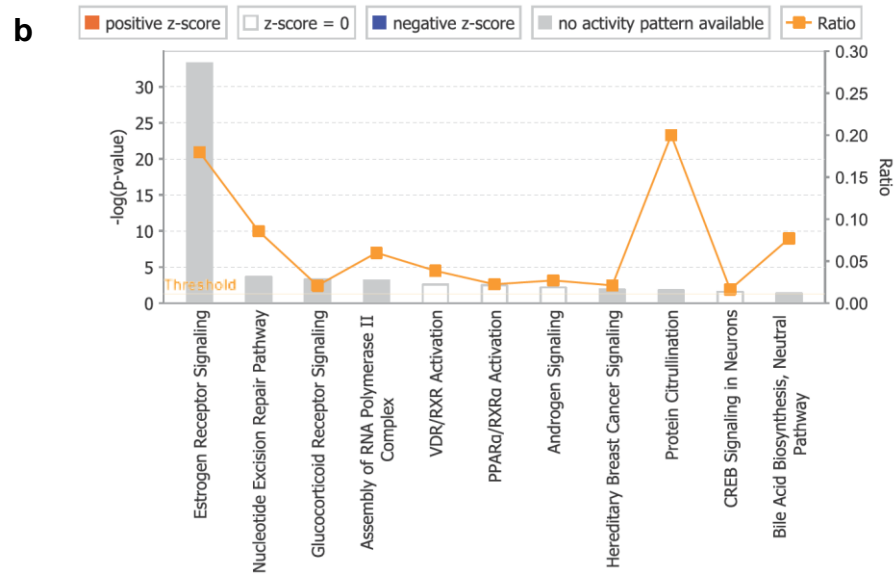

**Suppl. Figure 9. Protein-protein interaction network and pathways targeted by miR-487b in GBM<sup>INV</sup> cells.** (a) The target genes of miR-487b were identified through reverse reverse search of TargetScan and their expression levels extracted from mRNA profiling of the same sets of GBM<sup>INV</sup> and GBM<sup>TC</sup> cells. The target genes of micro-RNA were inputted into STRING (<http://www.string-db.org>) and 20 necessary proteins were added into the network except for the target genes. The output network is the protein-protein interactions between the targeted genes and those necessary added proteins. Red arrow indicated the node of genes. (b) Pathway enrichment analysis and associated diseases using genes from miR-487b targeted gene network. Fisher's exact test was employed. Significant enriched pathways with  $p < 0.05$  (equal to  $-\log(p\text{-value})$  larger than 1.301) were listed out. Ratio indicates the overlap rate of genes between the network genes and the pathway in Ingenuity database.

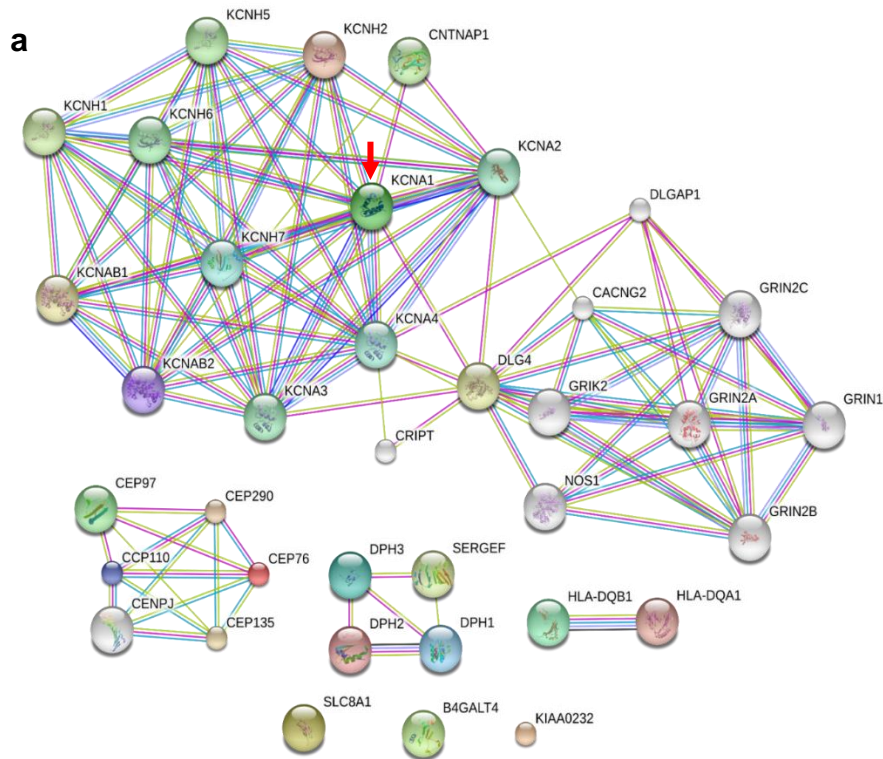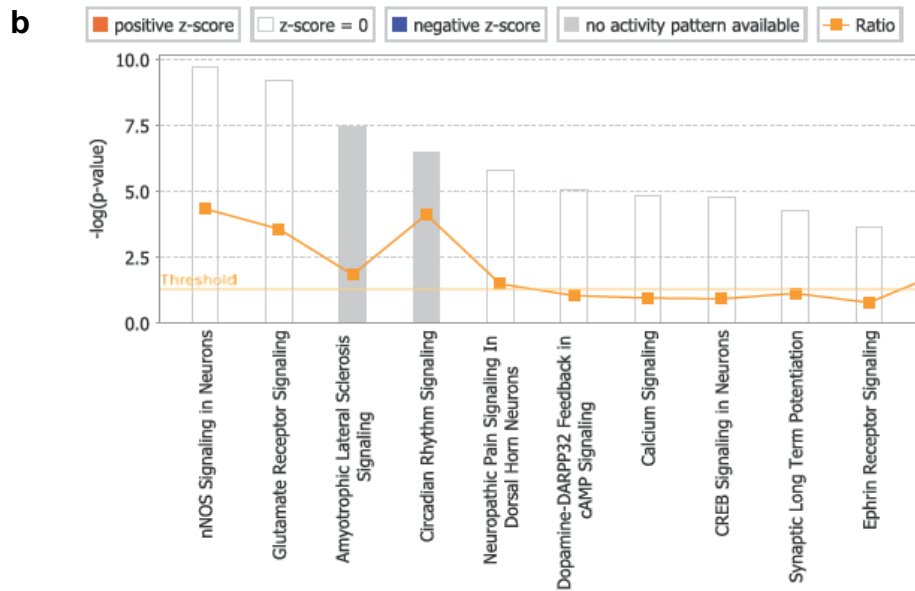

**Suppl. Figure 10. Protein-protein interaction network and pathways targeted by miR-369-5p in GBM<sup>INV</sup> cells.** (a) The target genes of miR-369-5p were identified through reverse reverse search of TargetScan and their expression levels extracted from mRNA profiling of the same sets of GBM<sup>INV</sup> and GBM<sup>TC</sup> cells. The target genes of micro-RNA were inputted into STRING (<http://www.string-db.org>)

and 20 necessary proteins were added into the network except for the target genes. The output network is the protein-protein interactions between the targeted genes and those necessary added proteins. Red arrow indicated the node of genes. **(b)** Pathway enrichment analysis and associated diseases using genes from miR-369-5p targeted gene network. Fisher's exact test was employed. Significant enriched pathways with  $p < 0.05$  (equal to  $-\log(p\text{-value})$  larger than 1.301) were listed out. Ratio indicates the overlap rate of genes between the network genes and the pathway in Ingenuity database.



a

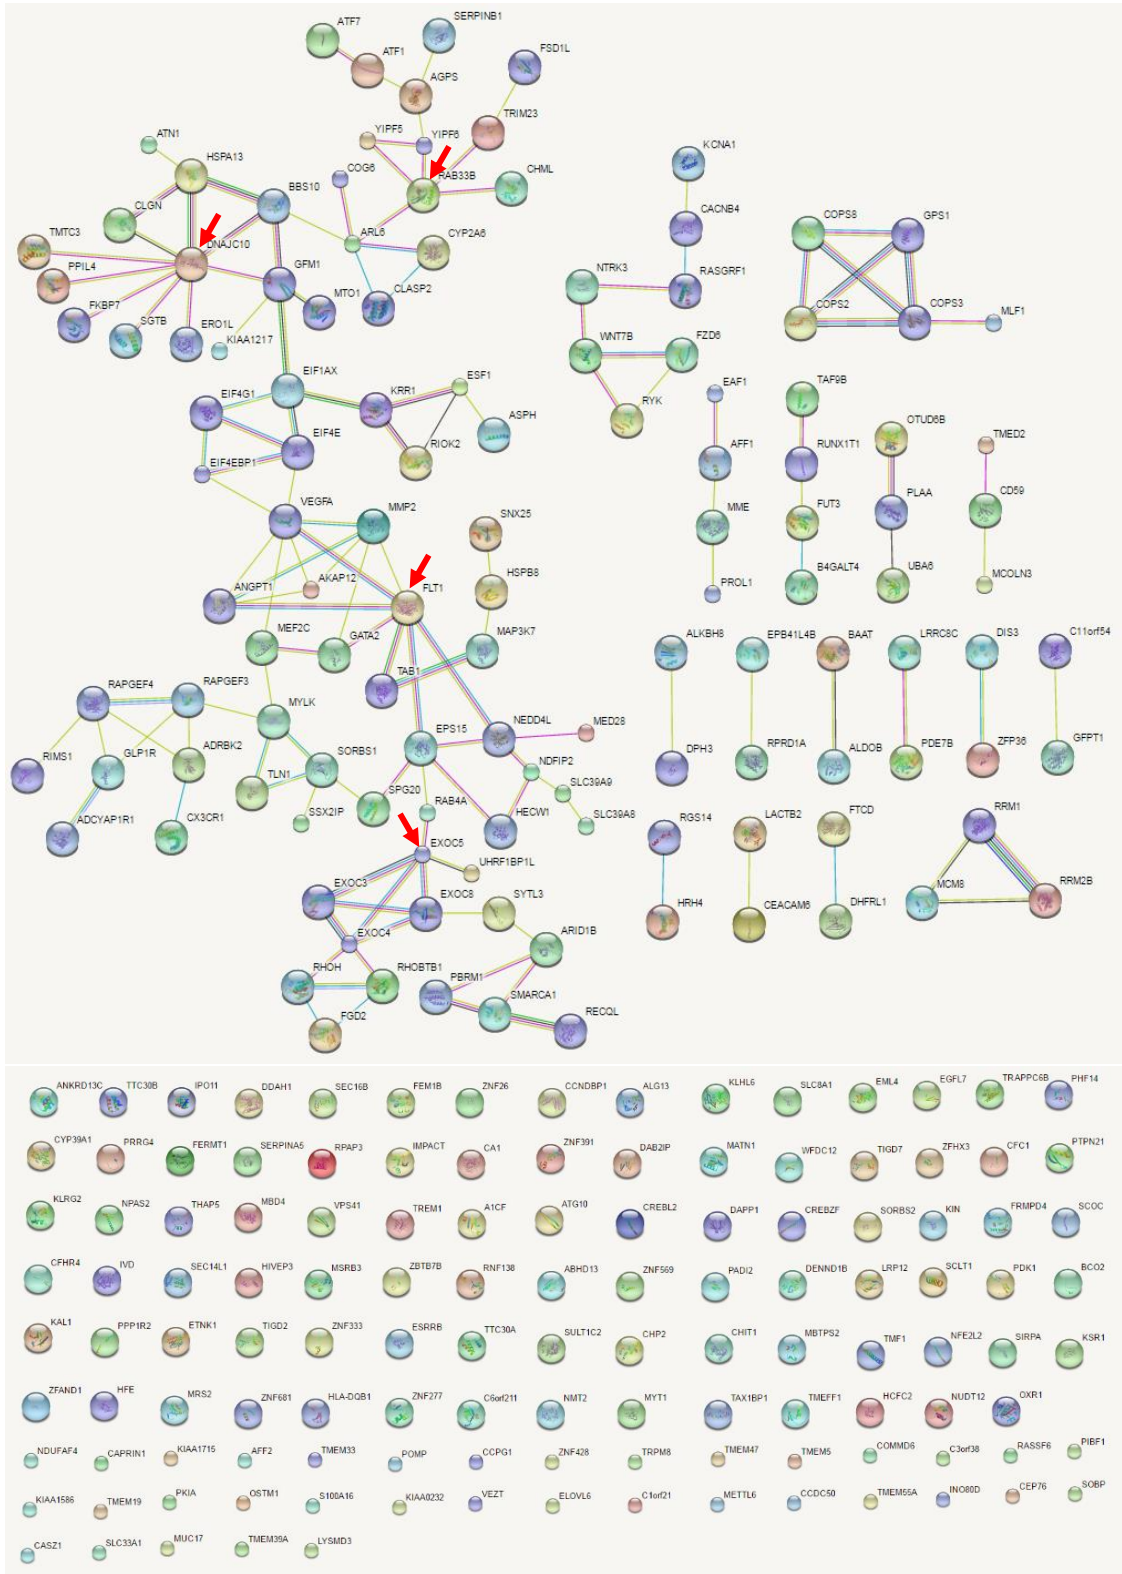

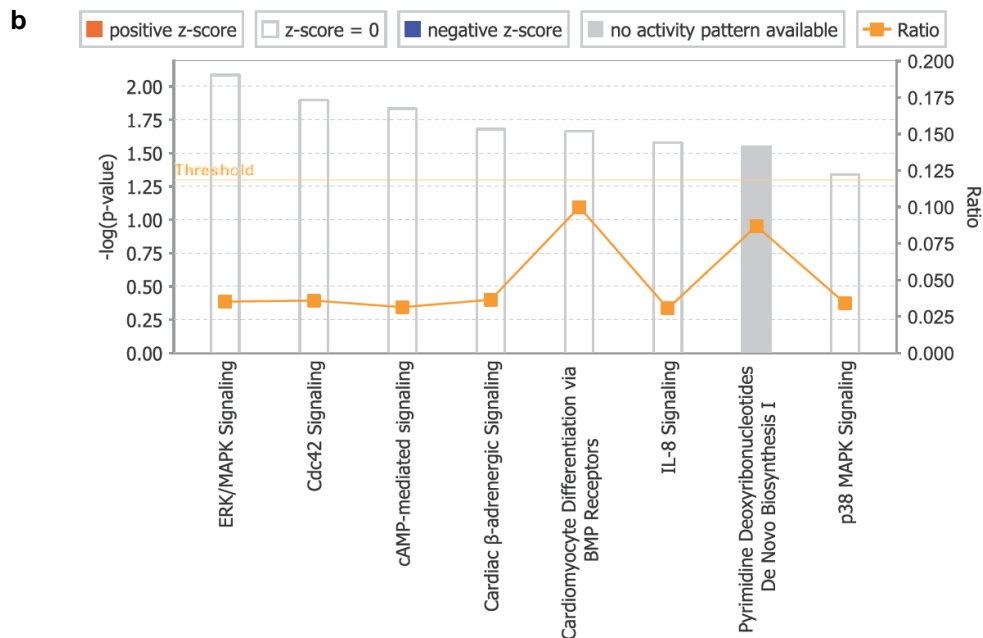

**Suppl. Figure 11. Protein-protein interaction network and pathways targeted by the three miRNAs<sup>INV</sup> in GBM<sup>INV</sup> cells.** (a) All the differentially expressed target genes of the three miRNAs were combined together and analyzed through STRING. Red arrow indicated the node of genes. (b) Pathway enrichment analysis and associated diseases using genes from all the three miRNA<sup>INV</sup> targeted gene network. Fisher's exact test was employed. Significant enriched pathways with  $p < 0.05$  (equal to  $-\log(p\text{-value})$  larger than 1.301) were listed out. Ratio indicates the overlap rate of genes between the network genes and the pathway in Ingenuity database.

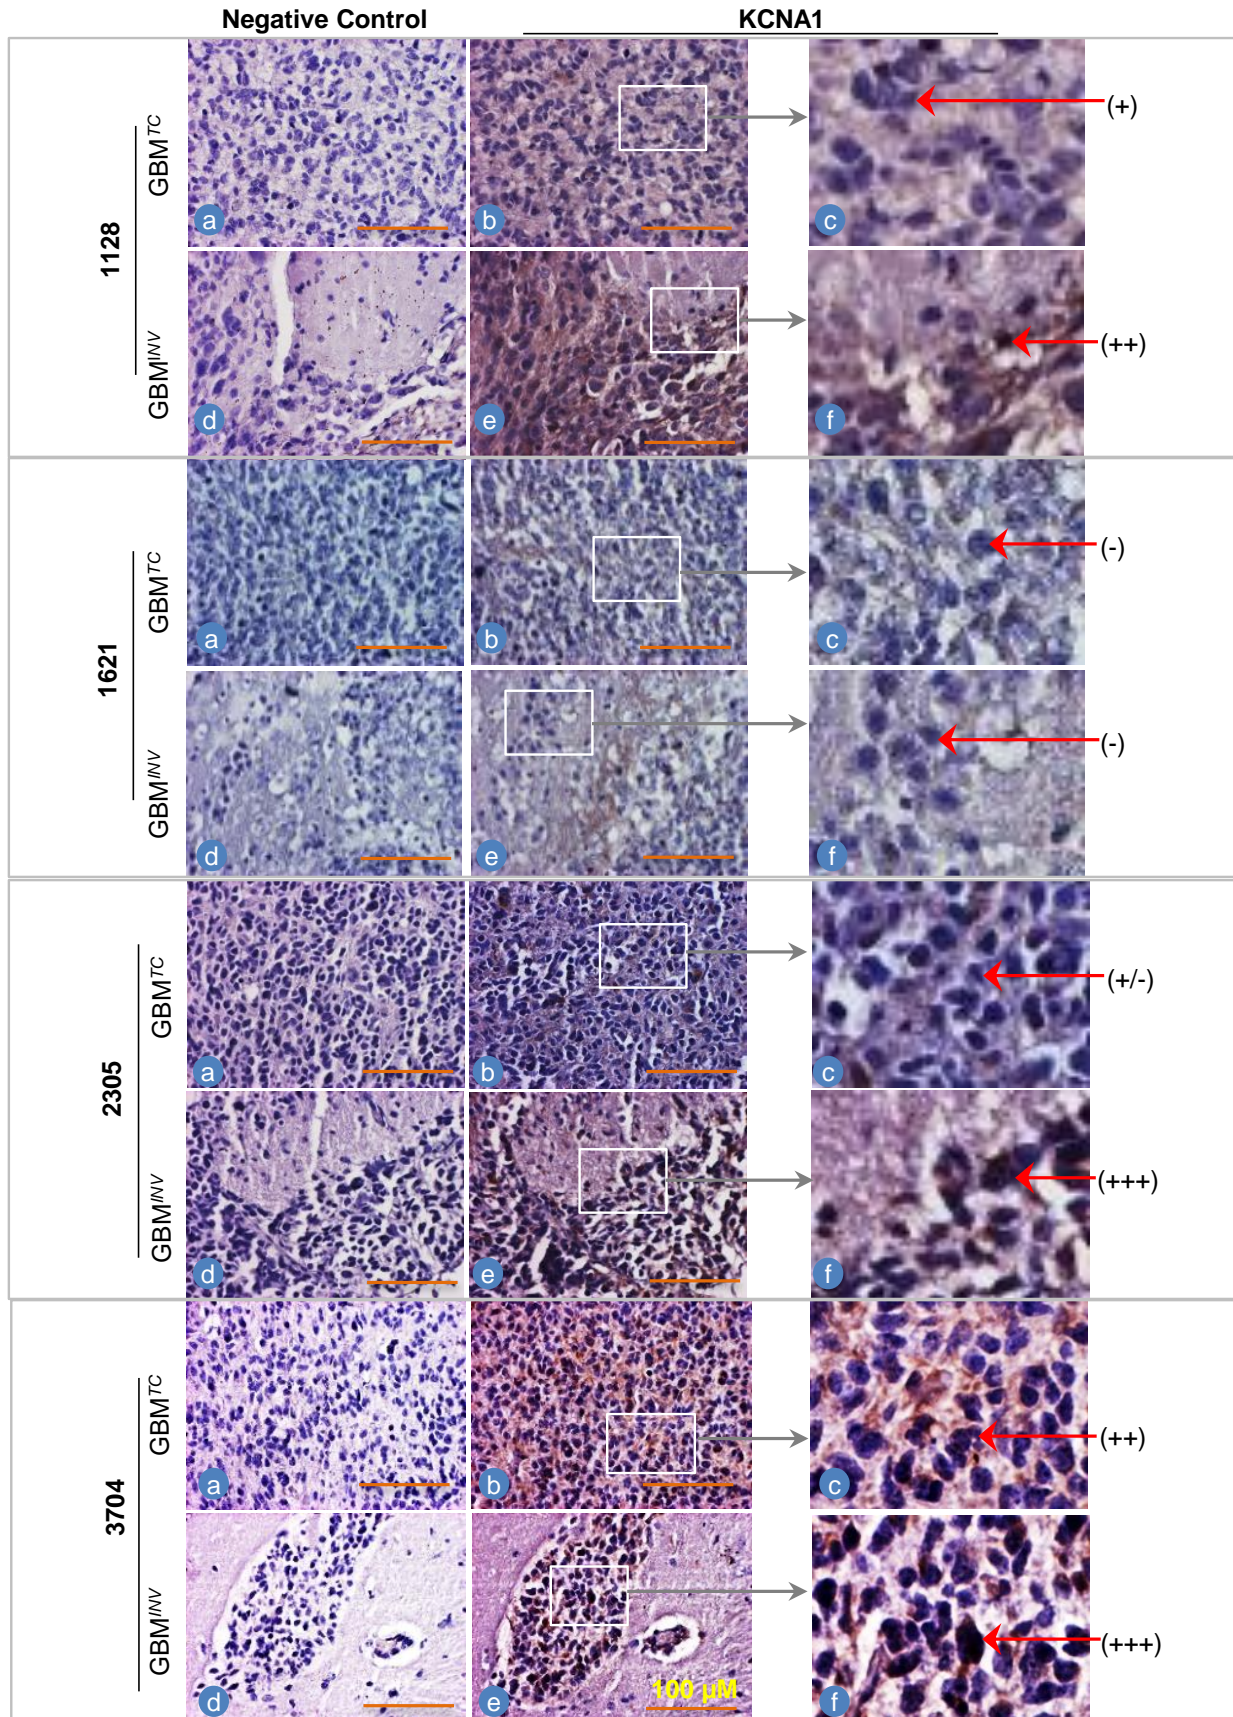

**Suppl. Figure 12. *KCNA1* protein expression was enriched in the invasive cells *in vivo* in PDOX mouse models of pGBM.** *KCNA1* protein expression in the invasive front (GBM<sup>INV</sup>) and tumor core (GBM<sup>TC</sup>) examined through IHC in the whole mouse sections of the four pGBM PDOX models (IC-1128GBM, IC-1621GBM, IC-2305GBM and IC-3704GBM) (IC-1406GBM and IC-3752GBM were shown in Fig. 5E) (40x). Slides incubated without primary antibodies were included as negative control.

**a** Inhibition of KCNA 1 did not affect neurosphere cell proliferation

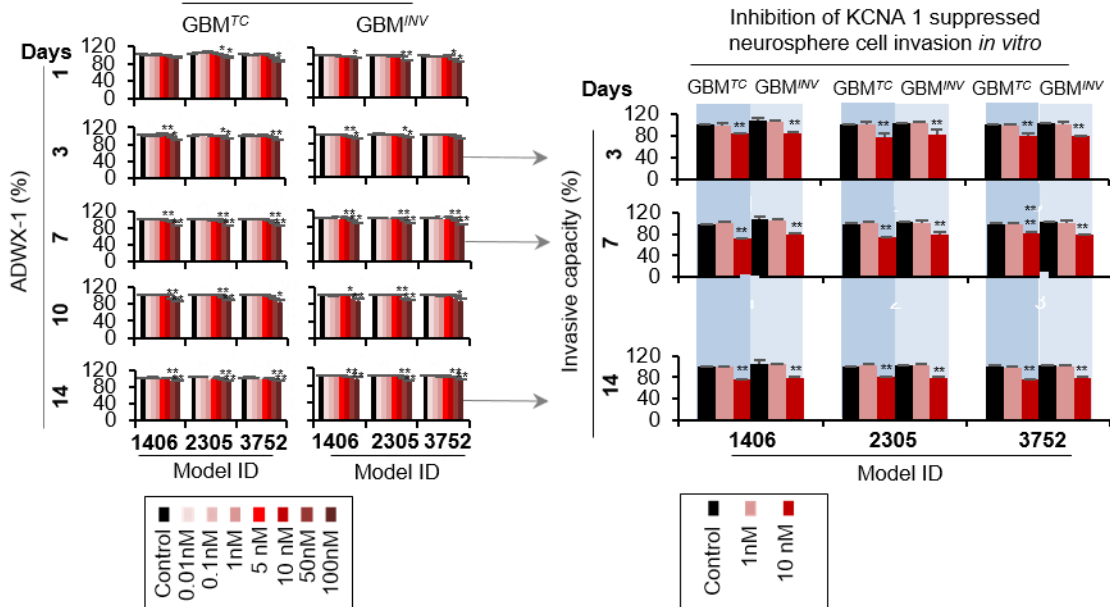

**b** Inhibition of KCNA 1 did not affect neurosphere cell proliferation

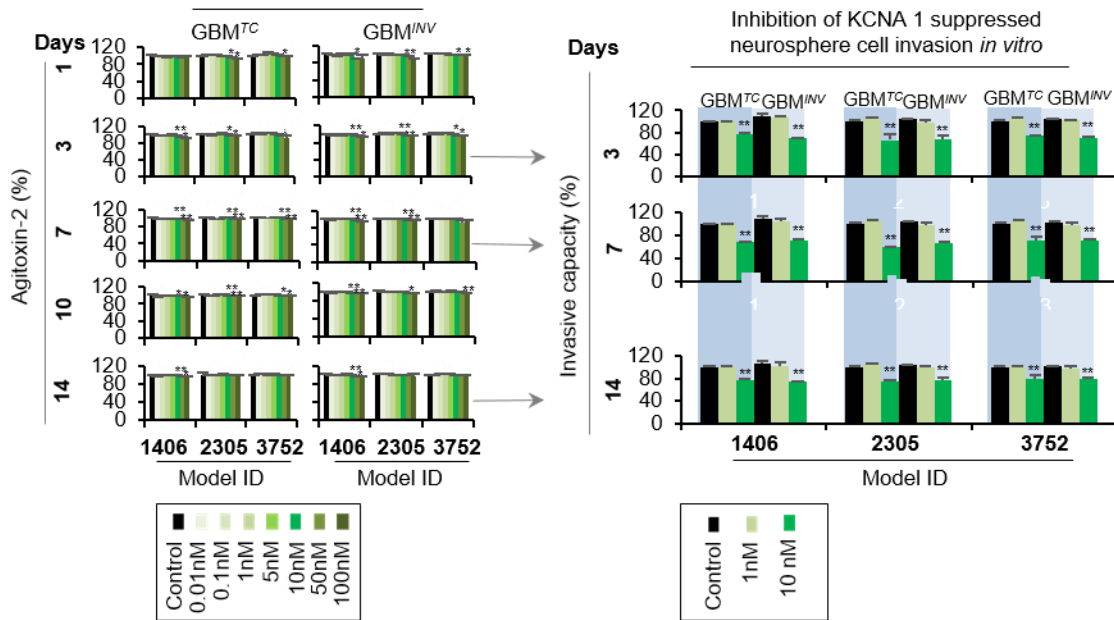

**c** Inhibition of KCNA 1 did not affect neurosphere cell proliferation

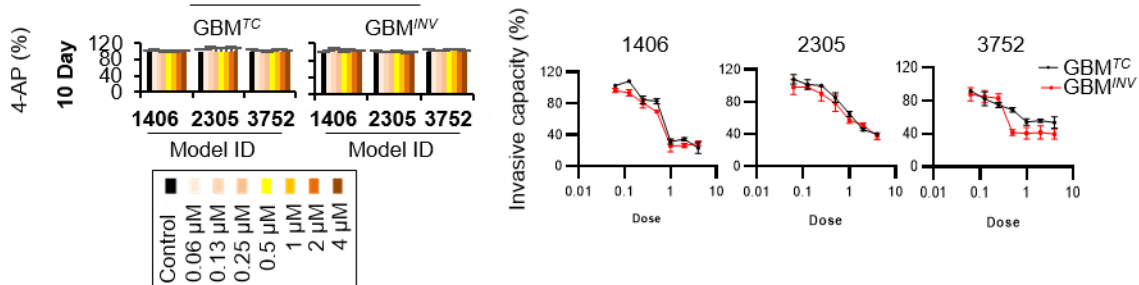

**Suppl. Figure 13. Pharmacological inhibition of *KCNA1* suppresses pGBM invasion *in vitro*.** Impact of *KCNA1* inhibitor ADWX-1 (**a**), Agitoxin-2 (**b**) and 4-AP (**c**) on cell proliferation were examined in three pairs of neurosphere cultures of GBM<sup>TC</sup> and GBM<sup>INV</sup> cells derived from three IC-1406GBM (**1406**), IC-2305GBM (**2305**) and IC-3752GBM (**3752**) models. Tumor cells were exposed to ADWX-1 and Agitoxin-2 at 0.01-100 nM for 1-14 days and 0.06-4 μM for 7 and 10 days for 4-AP. Changes of cell proliferation were examined with CCK-8 kit assay (\**P* < 0.05) (*left panels* of A-C); and the suppression of cell invasion was examined by treating neurospheres derived from tumor core (GBM<sup>TC</sup>) and invasive (GBM<sup>INV</sup>) cells for 3, 7 and 14 days for ADWX-1 and Agitoxin-2 and 7 and 10 days for 4-AP. Changes of cell invasion was examined with the CytoSelect 24-Well Cell Invasion Assay. Data are shown as mean ± SD. \**P* < 0.05.
